# Supplementary material for: Genomic epidemiology reveals transmission patterns and dynamics of SARS-CoV-2 in Aotearoa New Zealand
Source: PubMed Central journal article supplement (PMC7733492; doi:10.1038/s41467-020-20235-8), 2020-12-11
Supplement: 41467_2020_20235_MOESM2_ESM.pdf [file 41467_2020_20235_MOESM2_ESM.pdf]

## **Descriptions of Additional Supplementary Files**

### **Supplementary Data 1**

**Description:** A list of genomes and which amplification and sequencing method was used in for each case. A list of GISAID accession numbers from the global data set used in this study.
